# Supplementary material
Source: PubMed Central journal article supplement (PMC3302441)
Supplement: supp_32.7.1226_MCB-MCB05988-11-s01.pdf [file supp_32.7.1226_MCB-MCB05988-11-s01.pdf]

Analysis: 419 adlib - 2008-06-11 03:46 PM

■ 419 adlib - 2008-06-11 03:46 PM

■ Ratio

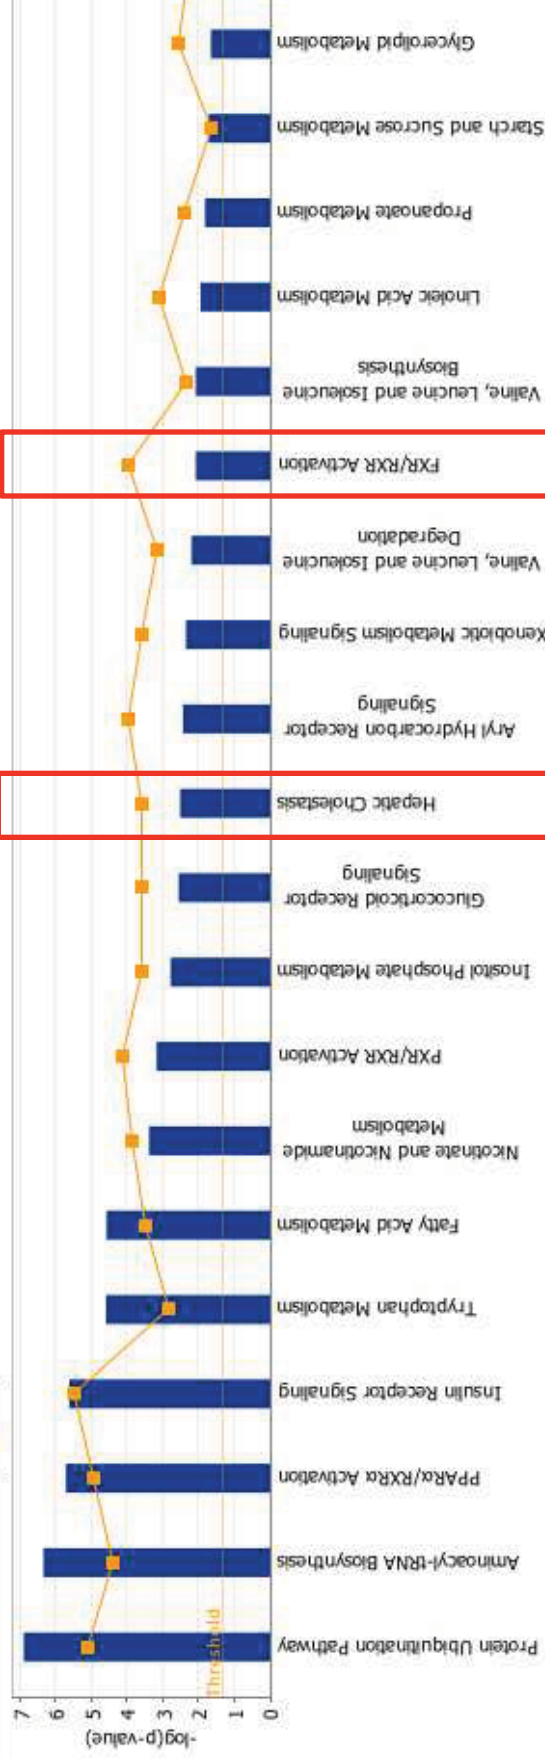

© 2000–2011 Ingenuity Systems, Inc. All rights reserved.

**Figure S1 Hepatic deletion of SIRT1 significantly affects hepatic cholestasis and FXR/RXR activation pathways.** Total RNA from 6 pairs of control and SIRT1 LKO mice were analyzed using Agilent Whole Genome Mouse 4x44 multiplex format oligo arrays, following the Agilent 1-color microarray-based gene expression analysis protocol. The significantly altered gene probes ( $p < 0.05$ ) in SIRT1 LKO mice were then analyzed by Ingenuity Pathway Analysis (IPA software) to identify significantly affected canonical pathways. The  $-\log$  values of the P values in IPA analysis were displayed against each pathway.
